# Supplementary material for: A continuous flow process for the production of 2,5-dimethylfuran from fructose using (non-noble metal based) heterogeneous catalysis
Source: Royal Society of Chemistry journal article supplement (doi:10.1039/c7gc01055a), 2017-01-01
Supplement: c7gc01055a1.pdf [file c7gc01055a1.pdf]

## Supporting Information

# Continuous flow process for the production of 2,5-dimethylfuran from fructose using (non-noble metal based) heterogeneous catalysis

*Max Braun\**, *Markus Antonietti*

Max-Planck Institute of Colloids and Interfaces, Department of Colloid Chemistry, Research Campus Golm, 14424 Potsdam, Germany.

**Corresponding Author:**

\*email: [max.braun@mpikg.mpg.de](mailto:max.braun@mpikg.mpg.de)

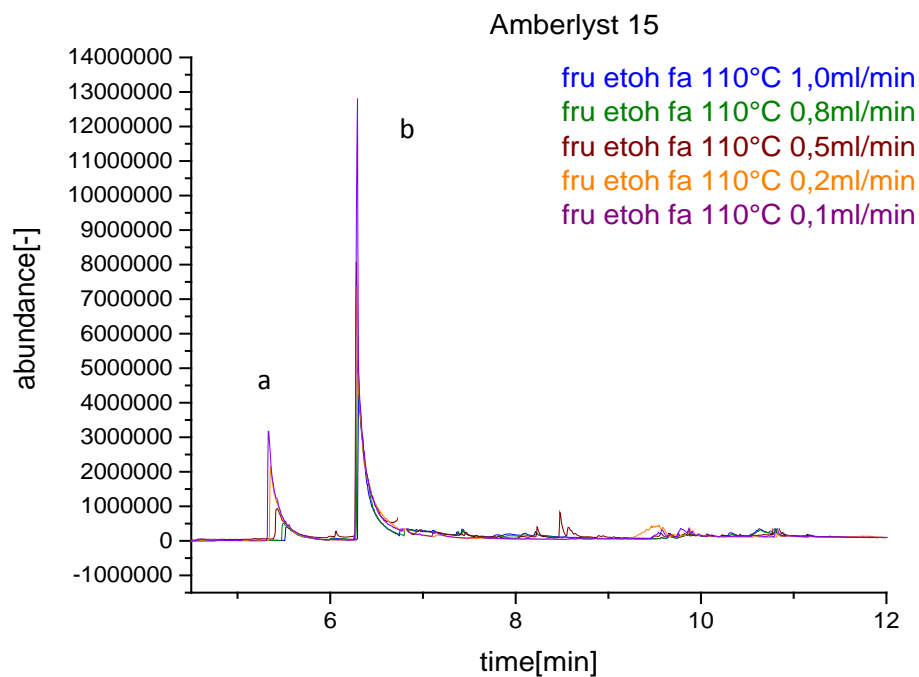

**Figure S1:** GC-MS Chromatogram of product solution of 0.05 M fructose/ethanol/0.5 M formic acid solution after a run over Amberlyst 15 in 250 mm column; exemplary at different flow rates; peak a) represents the ethyllevulinate, peak b) the HMF derivatives, mainly 5-ethoxymethylfurfural.

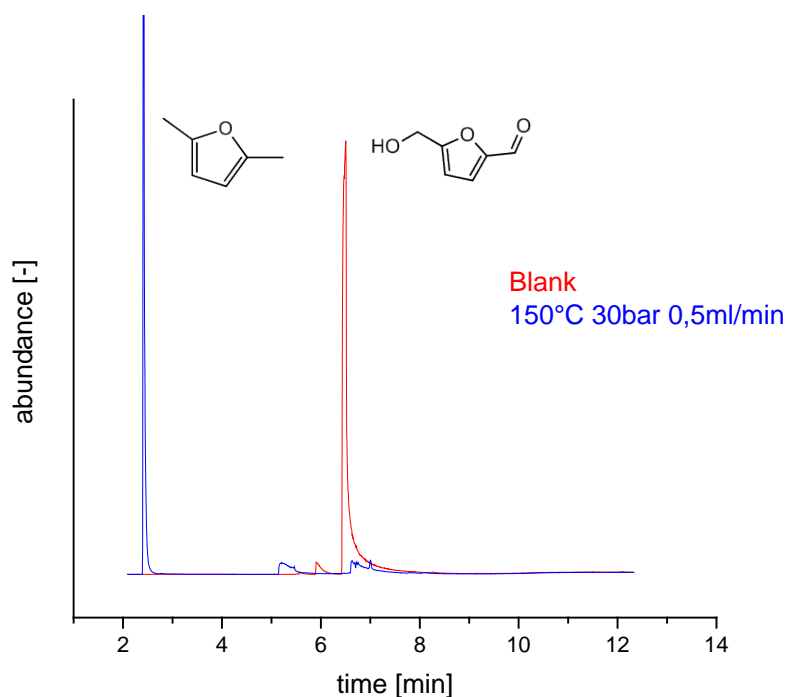

**Figure S2:** Conversion of 0.05 M HMF in ethanol solution using 150 °C, 30 bars and 0.5 mL min<sup>-1</sup>. The blank is shown in red and was almost fully converted to DMF (blue). 1.68 g of 10 wt % Ni@WC was used in a 70 mm cartridge, using hydrogen from in situ electrochemical water-splitting in the H CUBE Pro itself.

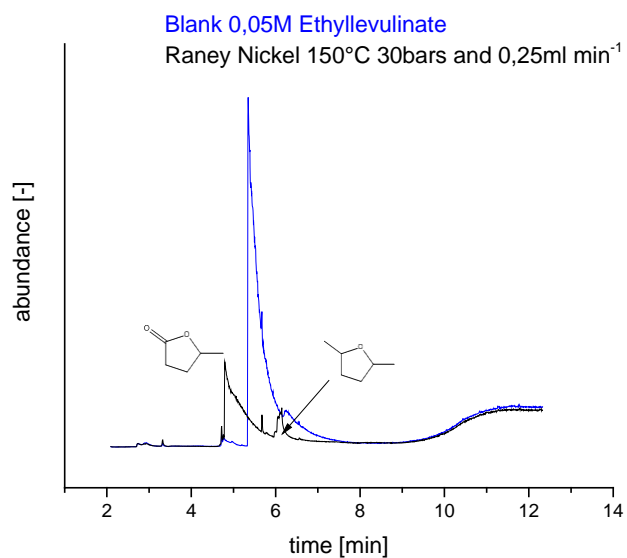

**Figure S3:** Conversion of 0.05 M ethyllevulinate ethanol solution using 150 °C, 30 bars and 0.25 mL min<sup>-1</sup>. The blank solution was fully converted and the products were identified with a mass spectrometer connected to the GC. Raney nickel showed main selectivity to  $\gamma$ -valerolactone and the fully hydrogenated product 2,5-dimethyltetrahydrofuran.

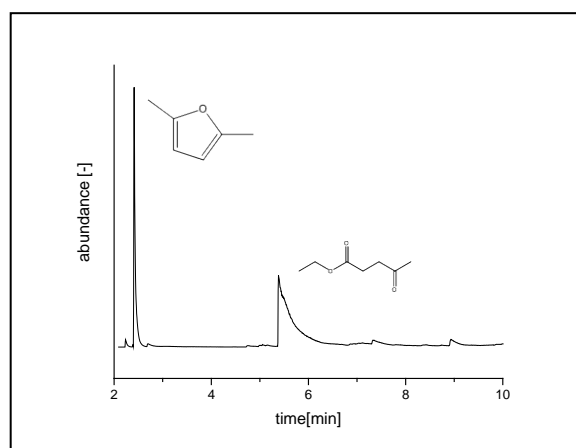

**Figure S4:** Qualitative GC –MS chromatogram of reaction products directly produced in a single run from fructose in solution in the combined system using Amberlyst 15 and Ni@WC with 30 bar and 0.25 mL min<sup>-1</sup>.

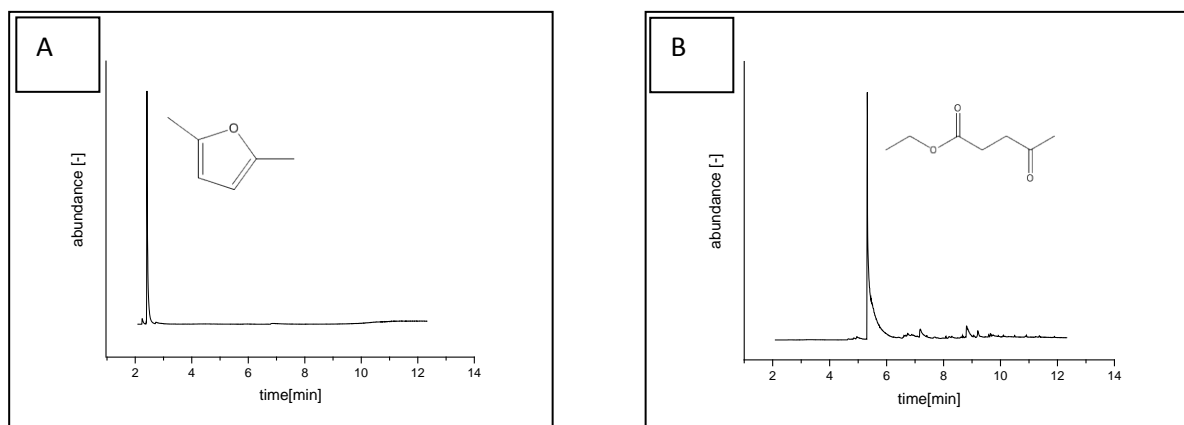

**Figure S5:** Qualitative GC-MS chromatogram of reaction products directly produced in a single run from fructose in solution in the combined system using Amberlyst 15 and Ni@WC after distillation. This reaction mixture was evaporated in the rotary evaporator and analyzed by GC-MS afterwards. The distillate (DMF) is shown in A. The slurry, what stayed in the bottom of the flask is represented by B (ethyllevulinate). The rotary evaporation conditions are: 55 °C water bath, 150 mbar reduced pressure.

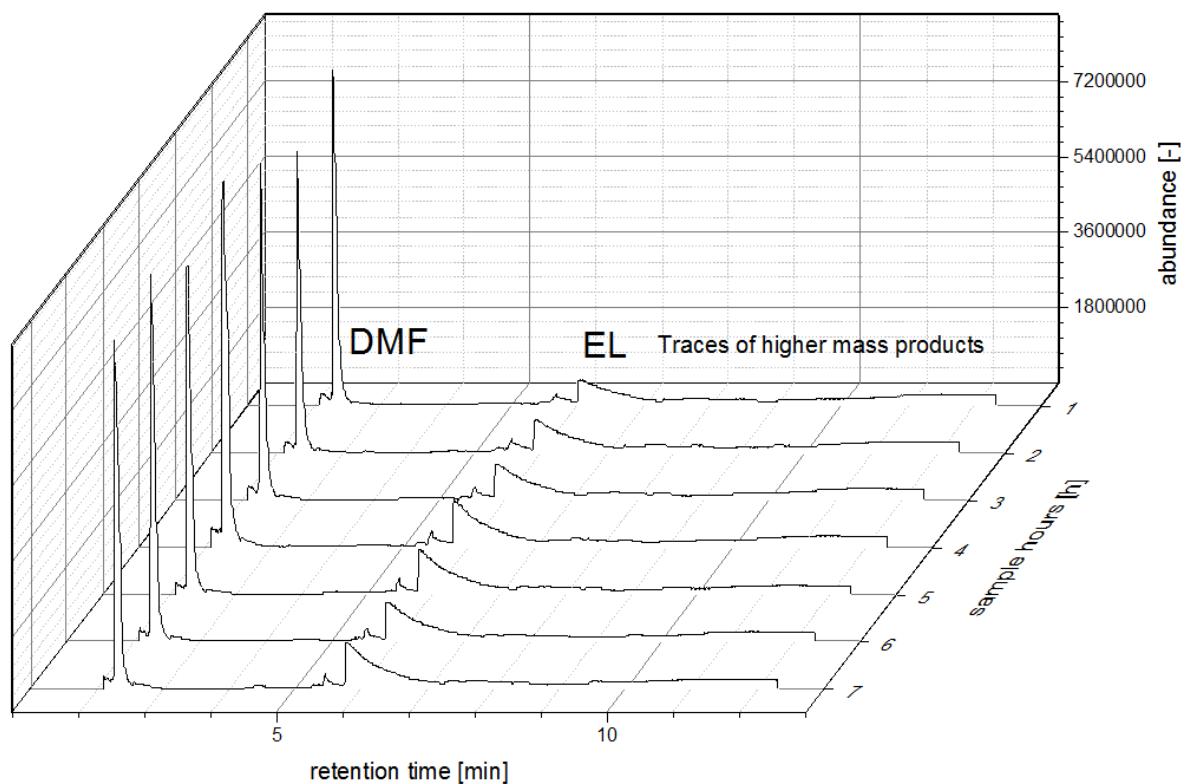

**Figure S6:** GC-MS chromatogram of the results during a 7 h continuous run using Amberlyst 15 and Ni@WC in series. The reaction parameters are as follows: 2.4 g Amberlyst 15 at 110 °C, 30 bar and 0.25 mL min<sup>-1</sup> in a 250 mm x 4.6 mm column. The residence time in the column was about 16.6 minutes. Furthermore the flow was directed into the 1.68 g Ni@WC column at 150 °C with additional hydrogen input. The residence time in here was about 3 minutes.

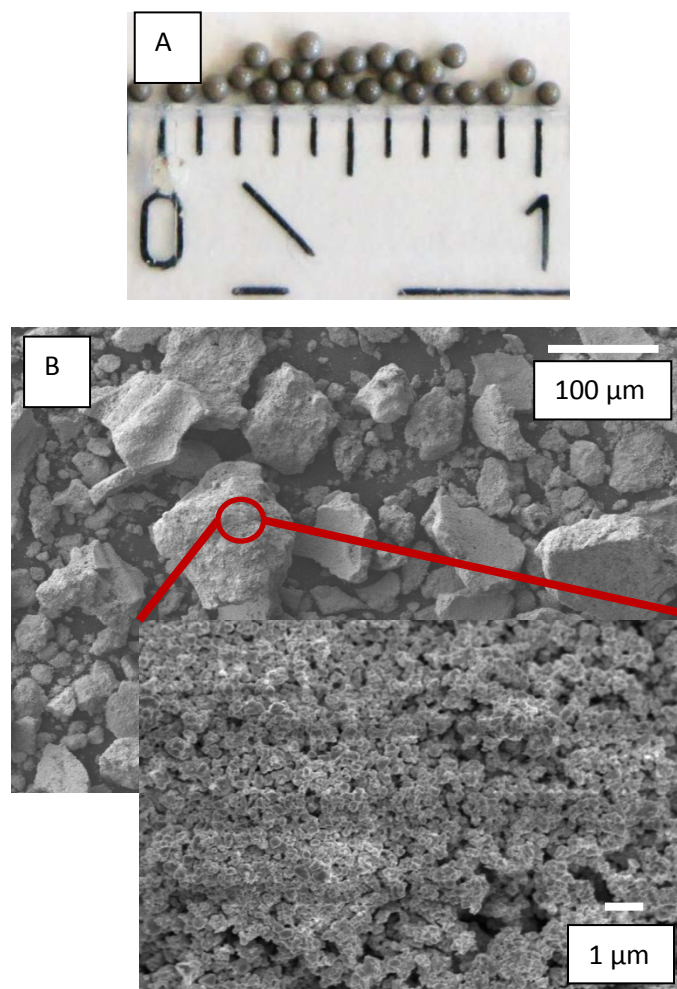

**Figure S7:** A: Amberlyst 15 spheres derived from Sigma Aldrich.( Sigma Aldrich CAS Number 12070-12-1) B: Ni@WC powder in different magnification. Nickel is deposited on top of commercial tungsten carbide (Sigma Aldrich CAS Number 39389-20-3), which agglomerates the structures to porous micrometer blocks.

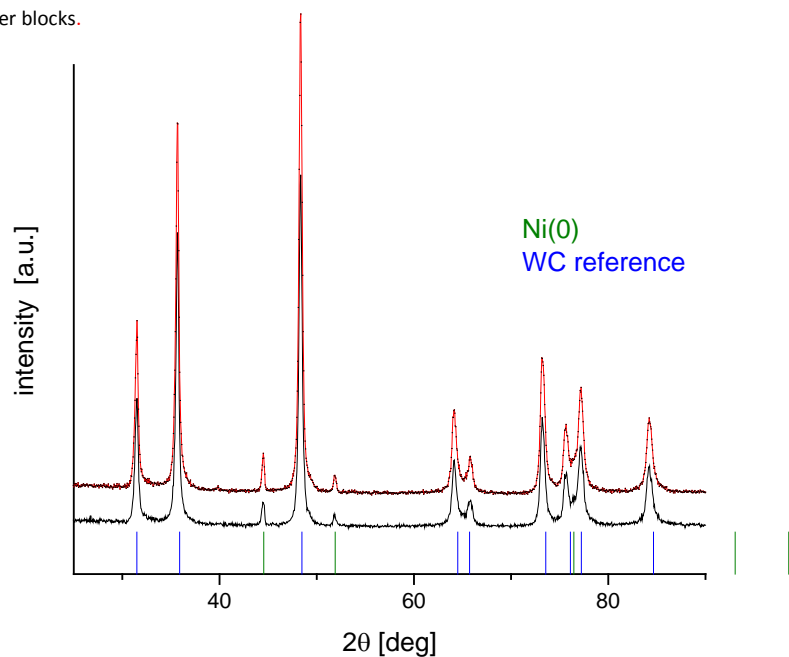

**Figure S8:** XRD results before (black) and after 7 hours (red) of reaction. The nickel is shown in green, whereas the tungsten carbide peaks are labeled in blue. Black is before the reaction and red is after the 7 h run with 150 °C, 30 bar and 0.25 mL min<sup>-1</sup>. (Reference pattern PDF4 database: Ni 00-004-0850; WC 01-077-4389)

Table T1: Elemental Analysis of fresh Amberlyst 15 before reaction and 7 hours used Amberlyst 15 with 110 °C in a 250 mm x 4.6 mm column with 0.05 M fructose conversion. Additionally the black colored 7 hours Amberlyst 15 catalysts from the entrance of the column (Figure 3C) is analyzed. A sulfur to carbon ratio is given.

| <b>Elemental Analysis</b>    | C [%] | S [%] | S/C  |
|------------------------------|-------|-------|------|
| Fresh Amberlyst 15           | 47.2  | 14.6  | 0.31 |
| 7 h Amberlyst 15             | 42.6  | 12.6  | 0.29 |
| 7 h Amberlyst 15 (Figure 3C) | 50.3  | 10.4  | 0.21 |

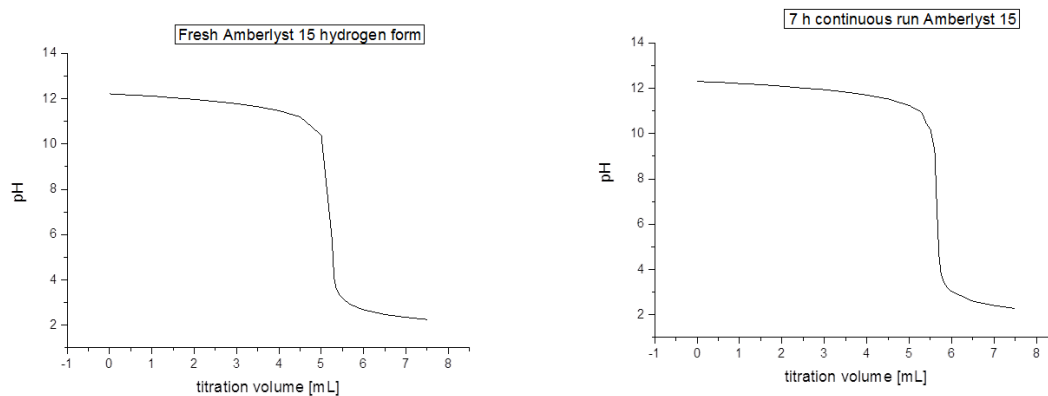

Concentration of acidic sites on catalyst

4,256 ion/kg

Concentration of acidic sites on catalyst

3,778 ion/kg

Figure S9: Titration of the solid acid catalyst Amberlyst 15. Before reaction and after a 7 h continuous run. The resulting values are referring to mol equivalent per kg.

Table T2: ICP-OES analysis of fresh Ni@WC and catalyst used for 7 h.

| <b>ICP Analysis</b> | Ni wt % |
|---------------------|---------|
| fresh Ni@WC         | 8.3     |
| 7 h used Ni@WC      | 8.5     |
